# Supplementary material for: Hypothermia increases aquaporin 4 (AQP4) plasma membrane abundance in human primary cortical astrocytes via a calcium/transient receptor potential vanilloid 4 (TRPV4)‐ and calmodulin‐mediated mechanism
Source: PubMed Central journal article supplement — Eur J Neurosci. 2017 Oct 13;46(9):2542–7. doi: 10.1111/ejn.13723 (PMC5765450; doi:10.1111/ejn.13723), 2017-10-13
Supplement: EJN-46-2542-s001.pdf [file EJN-46-2542-s001.pdf]

## Validation of anti-AQP4 antibody:

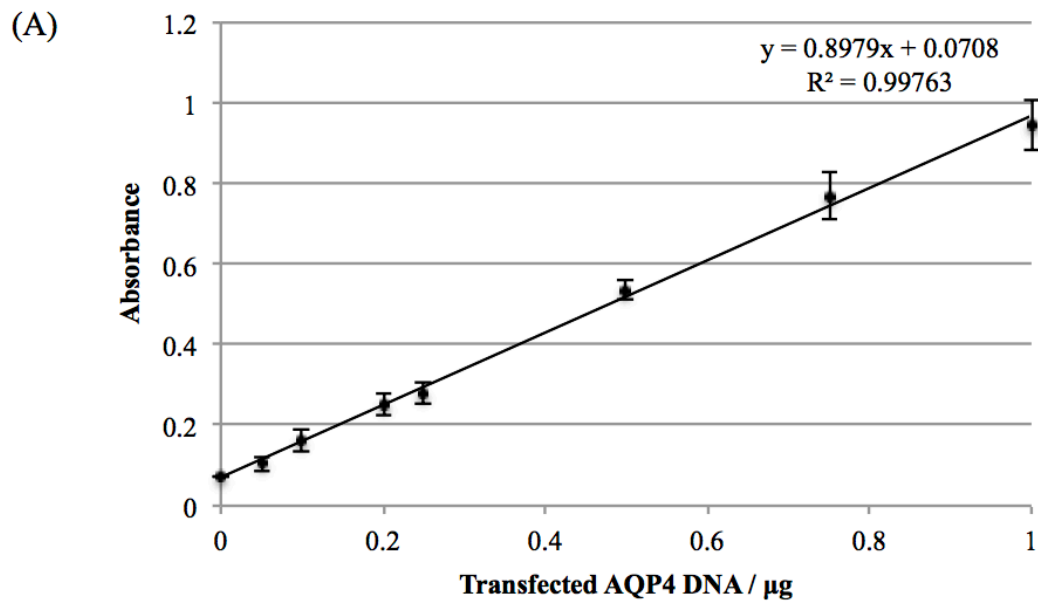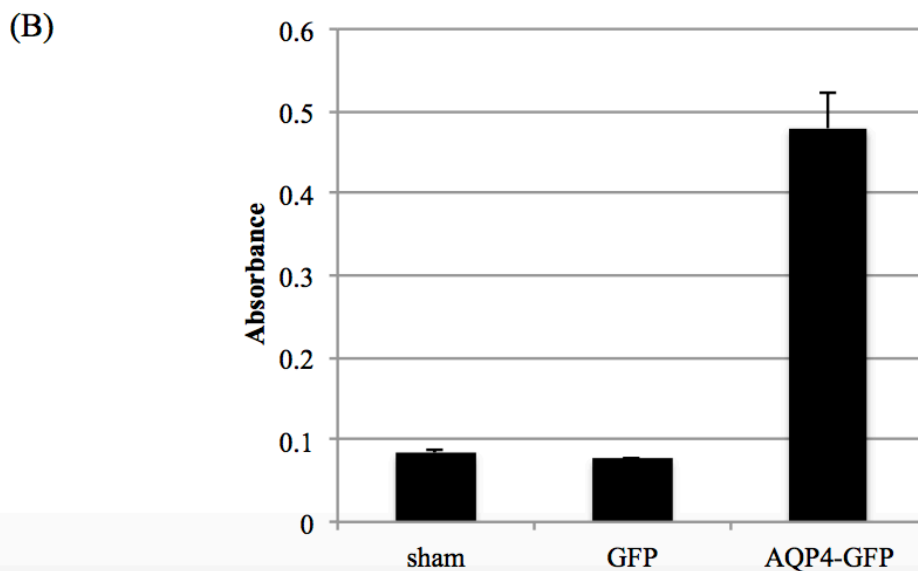

Supplementary Figure 1 (A) Linearity of surface expression signal of AQP4-GFP transfected into HEK293 cells as a function of antibody specificity to the amount transfected AQP4 cDNA. (B) Surface expression signal, detected using an anti-GFP antibody, from HEK293 cells transfected with either AQP4-GFP or GFP alone, demonstrating specificity for surface-localized protein. Data is represented as mean  $\pm$  SEM,  $n=3$ .

Linearity of the assay was confirmed by measuring the surface expression signal of HEK293 cells transfected with varying amounts (0-1  $\mu\text{g}$ ) of AQP4 cDNA / 15 mm cell culture well. Specificity for surface localized protein was confirmed by measuring the surface expression signal from HEK293 cells transfected with either AQP4-GFP or GFP alone, using an anti-GFP primary antibody. GFP alone should reside in the cytoplasm and give no surface signal, whereas GFP should be detected in the AQP4-GFP sample due to being covalently bound to the surface AQP4.
